# Supplementary material
Source: publisher site journal article supplement (https://www.dovepress.com/get_supplementary_file.php?f=322702.docx)
Supplement: Supplementary file 1 [file get_supplementary_file.php]

Supplementary Materials[[1]](#footnote-1)

**Materials and Methods**

**Preparation of β-CD inclusion complex**

We added AM volatile oil to a β-CD inclusion complex to improve its oxidative deterioration while masking the taste. Briefly, AM volatile oil dissolved in anhydrous ethanol was added to a saturated solution of β-CD (the weight ratio was 1:6) and stirred for 1.5 h at 500 r·min-1 and 30 ℃. After storage for 24 h at 4 ℃, the precipitate of the volatile oil/β-CD inclusion complex was obtained by extrusion filtration, washing three times with anhydrous ethanol, and drying in a vacuum oven. The prepared inclusion complex was stored in the dark and sealed for further use.

**Differential scanning calorimetry (DSC) analysis**

Thermal analysis of volatile oil, β-CD, the physical mixture and the volatile oil/β-CD inclusion complex was performed with a Diamond DSC instrument (TA Instruments -Waters LLC, New Castle, Delaware, USA). The parameters were set as follows: the specimens sealed in the aluminium crimp cell were heated at a speed of 10 ℃·min-1 from 25 to 300 ℃ under an ultrahigh-purity nitrogen atmosphere.

**X-ray powder diffraction (XRD) analysis**

The X-ray powder diffraction studies were conducted with a D8 Advance Davinci diffractometer (Bruker AXS GmbH, Karlsruhe, Germany) using Cu-Kα radiation at 35 kV, 20 mA, a theta-compensating slit, and a diffracted beam monochromator. The XRD spectra of volatile oil, β-CD, the physical mixture and the volatile oil/β-CD inclusion complex were recorded from 5 to 50 ℃ with a heating speed of 2 ℃·min-1.

**Gastric pellet core preparation**

The GPs cores were prepared using the extrusion-spheronization method, with each batch size being 100 g. For preparation of the GPs core, 50 g of β-CD inclusion complex, 5 g of PVPP, 30 g of MCC and 15 g of lactose were screened through a 0.80 mm diameter sieve and mixed in a planetary mixer (Kenwood Chef Classic, UK) at 200 r·min-1 for 10 min. Then, 40 g distilled water as a granulating liquid was added slowly while the dry ingredients were stirred, and the stirring was maintained until the mixture formed a wet mass of suitable consistency. The wet mass was then extruded at 20 Hz using a rotary gear extruder (GEA, NICA™ E140, Germany) with a perforation 0.80 mm in diameter. Then, the extrudates were subjected to a spheronizer (GEA, NICA™ S450, Germany) at 500 r·min-1 for 6 min. The resulting pellet cores were dried in a hot air oven (Shanghai Jinghong Experimental Equipment Co., Ltd. Shanghai, China) at 40 ℃ until the weight remained constant. The dried pellet core was sieved to obtain 30-18 mesh for the following coating.

**Preparation of gastric-coated pellets**

After extrusion-spheronization, the GPs cores were coated with 4% (w/v) HPMC as the gastric coating layer with a coating weight level of 5% (w/w) using a bottom spray fluidized bed coater (GEA, FlexStream™ MP1, Germany) fitted with a cylindrical partition tube (Wurster insert, diameter = 47 mm, height = 180 mm). The coating parameters are summarized in **Table S1**. The GPs were further fluidized for 30 min to minimize the solvent residue after coating. The coating weight gain (WG %), total yield (%), coating efficiency (RSDw) expressed as the relative standard deviation of the mean weight applied in three experiments, and coating loss (%) were calculated by the following equations:

WG (%) = (WCP –WLP)/ WLP×100

Yield (%) =WCP/WLP×100

RSDw (%) =×100

Coating loss (%) = (WTH –WR)/ WTH×100

where WLP and WCP represent the mean weight of loaded pellets and coated pellets, respectively. WTH and WR indicate theoretical weight gain and actual weight gain, respectively.

**Enteric pellet core preparation**

The EP cores were also prepared through the extrusion-spheronization method. Each batch size of 100 g of pellet core contained 27 g *Coptis chinensis* Franch extract (berberine content was more than 97%), 5 g PVPP, 48 g MCC and 20 g lactose. Distilled water (30 g) was added as the granulating liquid, and HPMC solution (20 g) was added as the binding liquid when stirring the dry powder excipients. The process operation and parameters were the same as those used to construct the GPs core.

**Preparation of enteric-coated pellets**

The EPs core with a theoretical drug loading of 13.4% (w/w) was coated in a fluidized bed coater using 4% (w/v) HPMC solution, with an optimized weight gain of 2% (w/w) to prevent potential drug/enteric polymer interactions and/or migration of the drug from the interior of the pellets to the polymer films during coating.

The enteric coating dispersion was prepared by mixing EUDRAGIT®FS 30D, EUDRAGIT® L 30D-55, GMS, TEC, Tween-80 and purified water. The coating process parameters are summarized in **Table S1**. The pellets were dried for an additional 30 min at 40 ℃ and solidified at 35 ℃/40% RH for 24 h to minimize the solvent residue and increase the uniformity and stability of the pellet coating layer after coating.

**Table S1** Process parameters for application of the gastric-coating or sub-coating layer

| Process | Parameter | |
| --- | --- | --- |
| Gastric or sub-coating layer | Enteric-coating layer |
| Spray nozzle diameter (mm) | 1.0 | 1.0 |
| Atomization pressure (bar) | 1.2 | 1.5 |
| Spray rate (g/min) | 2.0→3.0 | 1.5→2.0 |
| Inlet temperature (℃) | 42 ± 2 | 38 ± 2 |
| Product temperature (℃) | 38 ± 2 | 28 ± 2 |
| Fluid air flow rate (m3/h) | 50-65 | 50-65 |
| Drying temperature (℃) | 40 | 40 |
| Drying time (min) | 30 | 30 |

**Table S2** Process stability index for pellet preparation

| Pellet Type | WG (%) | Yield (%) | RSDw (%) | Coating loss (%) |
| --- | --- | --- | --- | --- |
| GPs | 4.30 | 104.30 | 20.93 | 14 |
| Sub-Ps | 1.67 | 101.67 | 14.00 | 16.67 |
| EPs | 17.47 | 138.47 | 24.24 | 12.67 |

**Table S3** Scoring system for the disease activity index (DAI)

| Score | Weight loss (%) | Stool consistency | Blood in faeces |
| --- | --- | --- | --- |
| 0 | No weight loss | Normal | Negative |
| 1 | 0weight loss2 | Loose | Occult blood a |
| 2 | 2weight loss4 | - | Occult blood b |
| 3 | 4weight loss6 | Diarrhea | Occult blood c |
| 4 | 6 | - | Gross blood |

**Notes:** a Weakly positive: blue in 30-60 s, b Positive: immediately turquoise, c Strongly positive: immediately blue. Data from these studies.32–34

**Table S4** Scoring system for the colon mucosal damage index (CMDI)

| Score | Observations |
| --- | --- |
| 0 | No damage to the mucosa |
| 1 | Hyperemia without ulcers |
| 2 | Hyperemia and thickening without significant ulcers |
| 3 | Linear ulcers with inflammation at one site |
| 4 | More than 2 sites of ulceration or inflammation |
| 5 | More than 2 sites of ulceration or inflammation or one site of ulceration and inflammation extending more than 1 cm along the length of the colon |
| 6-10 | Damage covered more than 2 cm, score was further increased by one for every additional centimeter of involvement |

**Notes:** Data from these studies.35,36

**Table S5** Inflammation scoring (HS) based on microscopic histological changes in DSS-induced colitis

| Feature grade | Grade and description | | | | |
| --- | --- | --- | --- | --- | --- |
| 0 | 1 | 2 | 3 | 4 |
| Edema | None | Mild | Moderate | Severe |  |
| Erosion-ulceration | The epithelium is intact | Involvement of the lamina propia | Area of ulceration involving submucosa | Area of ulceration are transmural |  |
| Crypt damage | None | Basal 1/3 damaged | Basal 2/3 damaged | Only surface epithelium intact | Entire crypt and epithelium lost |
| Percentage of area affected by inflammation | None | 1-25 | 26-50 | 51-75 | 76-100 |

**Notes:** Data from these studies.37,38

1. Abbreviations: UC: Ulcerative colitis; BBR: Berberine; CC: *Coptis chinensis* Franch; AM: *Atractylodes macrocephala* Koidz; DPs: Dual-targeted pellets; DSS: Dextran sulfate sodium salt; AT-1: Atracylenolide I; β-CD: β-cyclodextrin; PVPP: Crosslinking polyvingypyrrolidone MCC: Microcrystalline cellulose; HPMC: Hypromellose; GMS: Glycerin monostearate; TEC: Triethylcitrate; GPs: Gastric coated pellets; EPs: Enteric coated pellets; Sub-Ps: EPs core coated with 4% HPMC as sub coating layer. [↑](#footnote-ref-1)
